# Supplementary material for: HCV elimination among people who inject drugs. Modelling pre- and post–WHO elimination era
Source: PLOS journal article supplement (doi:10.1371/journal.pone.0202109), 2018-08-16

# Supporting Information

**S4 Fig.** Model predictions concerning a 60% chronic HCV prevalence and 50% of the people who inject drugs sharing injection equipment. Tx: Antiviral treatment, HR: harm reduction

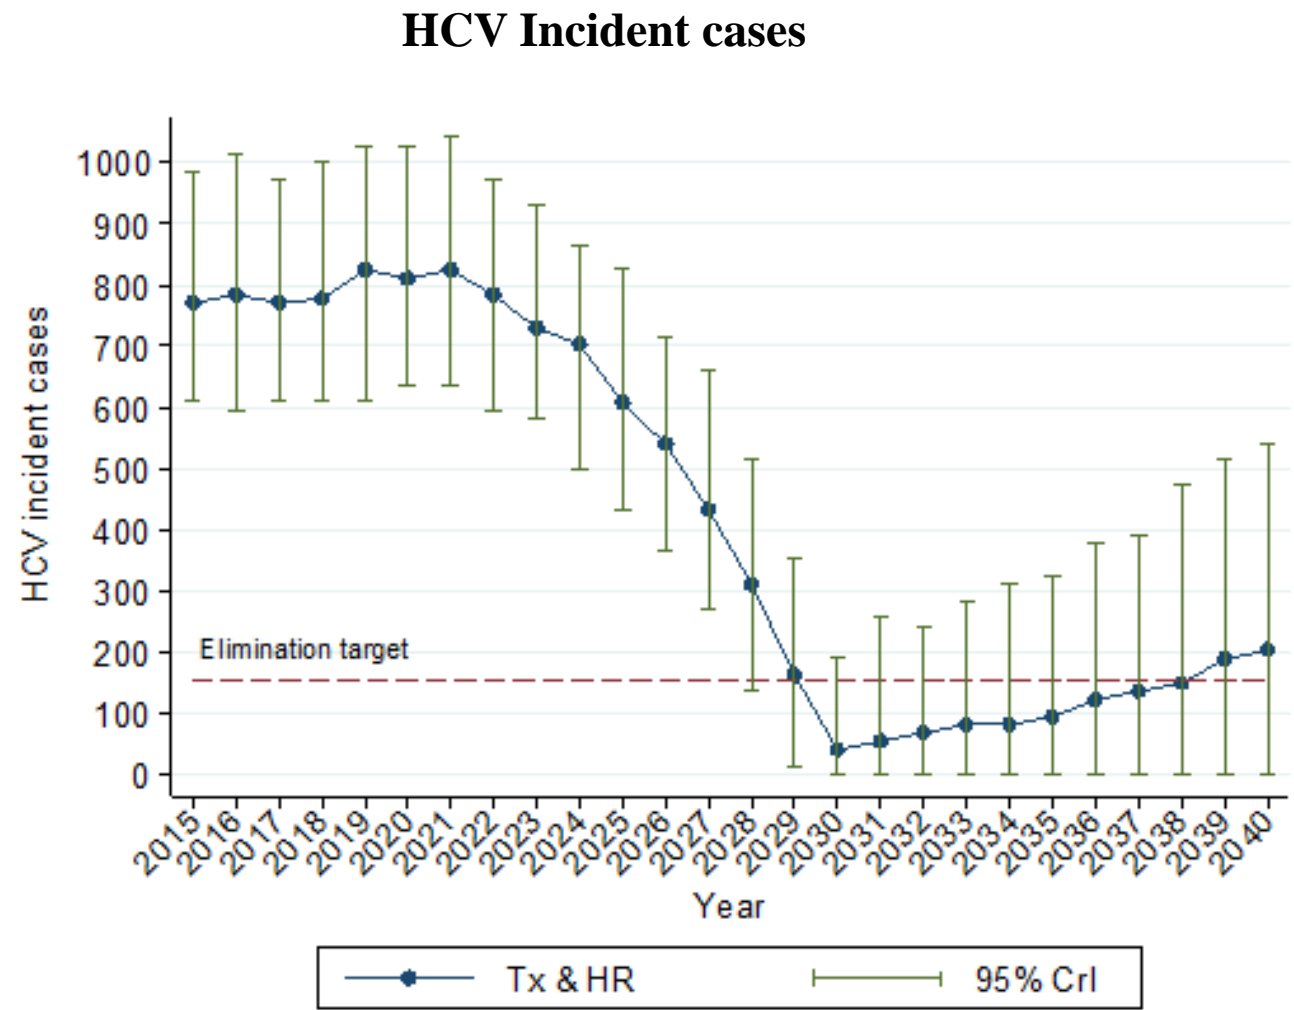

Supplement: S8 (10.1371/journal.pone.0202109.s008) [file journal.pone.0202109.s008]
